# Supplementary material for: Finding low-toxicity biopolymer solvents with high melting temperature and thermally induced phase separation of poly(ε-caprolactone)
Source: Royal Society of Chemistry journal article supplement (doi:10.1039/d4ma01033g), 2024-11-28
Supplement: d4ma01033g1.pdf [file d4ma01033g1.pdf]

# 1 Finding low-toxicity biopolymer solvents with high melting temperatures and thermally induced phase 2 separation of poly( $\epsilon$ -caprolactone) – **SUPPLEMENT**

3 Patrik Boura <sup>a,b</sup>, Lenka Krajakova <sup>a</sup>, Adam Bouz<sup>a</sup>, Silvestr Figalla<sup>c</sup>, Alexandr Zubov <sup>a</sup>, Bart Van der Bruggen <sup>b</sup>, \*Juraj Kosek <sup>a</sup>

4 <sup>a</sup> Department of Chemical Engineering, University of Chemistry and Technology Prague, Technická 5, 166 28 Prague 6, Czech Republic

5 <sup>b</sup> Department of Chemical Engineering, KU Leuven, Celestijnenlaan 200F, B-3001 Leuven, Belgium

6 <sup>c</sup> Institute of Materials Chemistry, Faculty of Chemistry, Brno University of Technology, Brno 61200, Czech Republic

7

## 8 **1. LIST OF PCL AND PLA DISSOLUTION CANDIDATES FOUND USING HSP**

9 PCL and PLA dissolution candidates at T = 80 °C found using HSP parameters, including:

- 10 • Evaluated HSP parameters changed due to elevated temperature,
- 11 • melting ( $T_m$ ) and boiling ( $T_b$ ) temperature,
- 12 • toxicity (1 ... lowest, 3 ... highest, - ... no data found),
- 13 • approximate purchase cost bracket                      \$ ... <100 \$ per 100 g                      \$\$ ... 100-200 \$ per 100 g                      \$\$\$ ... > 200 \$ per 100 g,
- 14 • and Relative Energy Difference (RED) calculated for standard as well as heated HSP parameters.

15

16 **Table 1A** PCL dissolution candidates and evaluated data, for PCL HSP taken from <sup>1</sup>

| Solvent                          | $\delta_D$<br>(Heated)<br>(Mpa <sup>1/2</sup> ) | $\delta_P$<br>(Heated)<br>(Mpa <sup>1/2</sup> ) | $\delta_H$<br>(Heated)<br>(Mpa <sup>1/2</sup> ) | $T_m$ (°C) | $T_b$ (°C) | Toxicity | Costs  | RED  | RED<br>(Heated) |
|----------------------------------|-------------------------------------------------|-------------------------------------------------|-------------------------------------------------|------------|------------|----------|--------|------|-----------------|
| BENZOIC ACID                     | 17.3                                            | 6.8                                             | 9.0                                             | 122.37     | 249.25     | 2        | \$     | 0.28 | 0.25            |
| TETRAMETHYLTHIOUREA              | 16.5                                            | 5.9                                             | 9.6                                             | 79.30      | 245.00     | 2        | \$\$   | 0.44 | 0.37            |
| GLYCIDYL METHACRYLATE            | 15.5                                            | 8.3                                             | 5.2                                             | 76.00      | 189.00     | 3        | \$\$   | 0.91 | 0.80            |
| STEARIC ACID                     | 15.5                                            | 3.2                                             | 5.0                                             | 69.40      | 358.00     | 1        | \$\$   | 1.11 | 0.98            |
| METHYL VINYL SULFIDE             | 15.6                                            | 4.8                                             | 5.5                                             | 66.60      | -          | -        | -      | 0.62 | 0.53            |
| 1,3,5-TRIOXANE                   | 17.8                                            | 9.0                                             | 7.9                                             | 64.00      | 114.50     | 1        | \$     | 0.65 | 0.63            |
| TRICHLOROBIPHENYL                | 18.3                                            | 5.2                                             | 3.7                                             | 61.15      | 347.50     | 2        | \$\$\$ | 1.08 | 0.96            |
| TRICHLOROACETIC ACID             | 17.4                                            | 5.7                                             | 10.4                                            | 56.85      | 197.63     | 1        | \$\$   | 0.74 | 0.64            |
| INDOLE                           | 18.8                                            | 7.4                                             | 5.9                                             | 53.00      | 253.00     | 2        | \$\$   | 0.96 | 0.90            |
| PENTAFLUOROBENZOPHENONE          | 18.4                                            | 7.9                                             | 4.9                                             | 37.00      | -          | 2        | \$\$\$ | 0.90 | 0.83            |
| METHYL P-TOLUATE                 | 18.1                                            | 6.4                                             | 3.5                                             | 33.00      | 217.00     | 1        | \$     | 1.05 | 0.92            |
| 4-(TRIFLUOROMETHYL) ACETOPHENONE | 17.9                                            | 6.0                                             | 3.2                                             | 31.50      | 180.98     | 1        | \$\$\$ | 1.08 | 0.93            |
| 4-VINYLPYRIDINE                  | 17.2                                            | 7.1                                             | 6.2                                             | 25.00      | 62.00      | 2        | \$     | 0.11 | 0.10            |
| CYCLODECANONE                    | 16.0                                            | 7.8                                             | 3.7                                             | 22.85      | 236.05     | 1        | \$\$\$ | 1.01 | 0.86            |
| TRANS-ANETHOLE                   | 18.1                                            | 4.2                                             | 7.9                                             | 22.00      | 235.50     | 1        | \$     | 0.52 | 0.50            |
| 1-CHLORO-4-ETHOXYBENZENE         | 18.4                                            | 6.2                                             | 4.0                                             | 21.00      | 213.00     | 2        | \$\$\$ | 1.00 | 0.89            |
| DIVINYL SULFIDE                  | 15.7                                            | 4.5                                             | 5.1                                             | 20.00      | 84.00      | 2        | -      | 0.69 | 0.59            |
| PENTAMETHYLENE SULFIDE           | 17.6                                            | 6.2                                             | 8.1                                             | 19.00      | 142.00     | 2        | \$\$\$ | 0.17 | 0.16            |
| 4-ACETYLMORPHOLINE               | 17.4                                            | 5.2                                             | 7.1                                             | 14.50      | 207.97     | 2        | \$\$   | 0.09 | 0.09            |

17

18

19 **Table 1B** PCL dissolution candidates and evaluated data, for PCL HSP taken from <sup>1</sup> – continuation

|                         |      |     |      |       |        |   |        |      |      |
|-------------------------|------|-----|------|-------|--------|---|--------|------|------|
| VINYL PYRROLIDONE       | 15.6 | 9.1 | 5.4  | 13.00 | 219.00 | 3 | \$     | 1.03 | 0.93 |
| ETHYLENE DIBROMIDE      | 18.3 | 3.4 | 7.9  | 10.00 | 131.00 | 3 | \$     | 0.80 | 0.77 |
| ETHYL CINNAMATE         | 17.5 | 8.0 | 3.7  | 7.75  | 271.75 | 1 | \$     | 0.92 | 0.81 |
| HEXAMETHYLPHOSPHORAMIDE | 17.6 | 8.4 | 10.3 | 7.10  | 235.00 | 3 | \$\$   | 1.03 | 0.92 |
| 1-DECANOL               | 16.7 | 2.5 | 9.1  | 6.75  | 230.20 | 2 | \$     | 0.93 | 0.85 |
| 2,5-DIMETHYLPYRROLE     | 17.4 | 7.5 | 6.2  | 6.50  | 171.00 | 2 | \$\$\$ | 0.19 | 0.18 |
| METHYLENE DIIODIDE      | 16.9 | 3.8 | 5.0  | 5.20  | 181.00 | 2 | \$\$   | 0.51 | 0.45 |
| 1-BROMO                 | 18.6 | 7.6 | 4.8  | 4.00  | 233.00 | 1 | \$     | 0.98 | 0.90 |
| DIBENZYL ETHER          | 16.5 | 3.6 | 6.7  | 3.60  | 288.30 | 2 | \$     | 0.37 | 0.34 |

20

21 **Table 2A** PLA dissolution candidates and evaluated data, for PLA HSP taken from <sup>2</sup>

| Solvent                              | $\delta_D$<br>(Heated)<br>(Mpa <sup>1/2</sup> ) | $\delta_P$<br>(Heated)<br>(Mpa <sup>1/2</sup> ) | $\delta_H$<br>(Heated)<br>(Mpa <sup>1/2</sup> ) | $T_m$ (°C) | $T_b$ (°C) | Toxicity | Costs  | RED  | RED<br>(Heated) |
|--------------------------------------|-------------------------------------------------|-------------------------------------------------|-------------------------------------------------|------------|------------|----------|--------|------|-----------------|
| BENZOIC ACID                         | 17.3                                            | 6.8                                             | 9.0                                             | 122.37     | 249.25     | 2        | \$     | 0.45 | 0.37            |
| p-BROMOBENZONITRILE                  | 19.4                                            | 9.1                                             | 5.3                                             | 113.00     | 237.00     | 2        | \$\$   | 0.90 | 0.86            |
| 3-METHYLINDOLE                       | 19.0                                            | 7.0                                             | 5.7                                             | 95.00      | 265.00     | 1        | \$\$\$ | 0.36 | 0.35            |
| 4-CHLOROBENZONITRILE                 | 18.6                                            | 7.8                                             | 3.7                                             | 95.00      | 223.00     | 2        | \$\$   | 0.59 | 0.52            |
| TETRAMETHYLTHIOUREA                  | 16.5                                            | 5.9                                             | 9.6                                             | 79.30      | 245.00     | 2        | \$\$   | 1.07 | 0.90            |
| 2,4-DICHLOROENZALDEHYDE              | 18.8                                            | 8.6                                             | 4.9                                             | 71.00      | 233.00     | 1        | \$     | 0.48 | 0.46            |
| 1,3,5-TRIOXANE                       | 17.8                                            | 9.0                                             | 7.9                                             | 64.00      | 114.50     | 2        | \$     | 0.37 | 0.34            |
| TRICHLOROBIPHENYL                    | 18.3                                            | 5.2                                             | 3.7                                             | 61.15      | 347.50     | 3        | \$\$\$ | 0.61 | 0.54            |
| TRICHLOROACETIC ACID                 | 17.4                                            | 5.7                                             | 10.4                                            | 56.85      | 197.63     | 2        | \$\$\$ | 1.08 | 0.90            |
| 2,4-DICHLORO-5-NITROBENZOTRIFLUORIDE | 18.9                                            | 7.5                                             | 3.4                                             | 55.00      | -          | 1        | \$\$   | 0.84 | 0.75            |
| INDOLE                               | 18.8                                            | 7.4                                             | 5.9                                             | 53.00      | 253.00     | 2        | \$     | 0.26 | 0.26            |
| o-CHLOROTHIOPHENOL                   | 19.2                                            | 6.9                                             | 9.1                                             | 49.00      | 205.00     | 2        | \$\$   | 0.89 | 0.80            |
| 4-CHLOROBENZALDEHYDE                 | 18.9                                            | 7.1                                             | 5.1                                             | 47.50      | 213.50     | 2        | \$     | 0.38 | 0.36            |
| p-BROMOBENZOYL CHLORIDE              | 19.2                                            | 6.4                                             | 5.0                                             | 42.00      | 247.00     | 2        | \$     | 0.56 | 0.53            |
| 3,4-DICHLORONITROBENZENE             | 19.1                                            | 7.1                                             | 3.7                                             | 41.00      | 255.00     | -        | \$\$\$ | 0.80 | 0.72            |
| 4-ETHOXYACETOPHENONE                 | 17.9                                            | 10.1                                            | 5.8                                             | 37.00      | 268.50     | 2        | \$\$\$ | 0.56 | 0.54            |
| PENTAFLUOROBENZOPHENONE              | 18.4                                            | 7.9                                             | 4.9                                             | 37.00      | -          | 2        | \$     | 0.26 | 0.24            |
| 4'-METHOXY ACETOPHENONE              | 18.0                                            | 11.0                                            | 6.4                                             | 36.00      | 250.00     | 1        | \$\$   | 0.89 | 0.86            |
| 5-BROMO-2-NITROBENZOTRIFLUORIDE      | 19.0                                            | 5.9                                             | 4.5                                             | 34.00      | 95.00      | 1        | \$\$\$ | 0.60 | 0.55            |
| METHYL P-TOLUATE                     | 18.1                                            | 6.4                                             | 3.5                                             | 33.00      | 217.00     | 1        | \$     | 0.54 | 0.46            |
| 4-(TRIFLUOROMETHYL) ACETOPHENONE     | 17.9                                            | 6.0                                             | 3.2                                             | 31.50      | 180.98     | 1        | \$\$\$ | 0.65 | 0.55            |

23 **Table 2B** PLA dissolution candidates and evaluated data, for PLA HSP taken from <sup>2</sup> – continuation

|                          |      |      |      |       |        |   |        |      |      |
|--------------------------|------|------|------|-------|--------|---|--------|------|------|
| 2,6-DICHLOROANISOLE      | 18.9 | 8.2  | 5.9  | 31.00 | 205.93 | 2 | \$\$   | 0.39 | 0.38 |
| DIPHENYL ETHER           | 18.7 | 3.1  | 5.3  | 26.88 | 258.31 | 2 | \$     | 0.95 | 0.91 |
| p-BROMOTOLUENE           | 18.4 | 6.7  | 3.7  | 26.80 | 184.35 | 1 | \$     | 0.49 | 0.42 |
| 2-BROMOTHIOPHENE         | 19.1 | 5.1  | 4.2  | 25.00 | 150.00 | 2 | \$     | 0.83 | 0.77 |
| 4-VINYLPYRIDINE          | 17.2 | 7.1  | 6.2  | 25.00 | 62.00  | 3 | \$     | 0.08 | 0.06 |
| TRANS-ANETHOLE           | 18.1 | 4.2  | 7.9  | 22.00 | 235.50 | 1 | \$     | 0.52 | 0.49 |
| 1-CHLORO-4-ETHOXYBENZENE | 18.4 | 6.2  | 4.0  | 21.00 | 213.00 | 2 | \$\$\$ | 0.43 | 0.38 |
| p-CHLOROACETOPHENONE     | 18.7 | 7.5  | 3.7  | 20.00 | 232.00 | 2 | \$     | 0.62 | 0.55 |
| ACETOPHENONE             | 18.7 | 8.4  | 3.4  | 19.45 | 202.11 | 1 | \$     | 0.83 | 0.73 |
| PENTAMETHYLENE SULFIDE   | 17.6 | 6.2  | 8.1  | 19.00 | 142.00 | 2 | \$\$\$ | 0.21 | 0.18 |
| p-CHLOROBENZOYL CHLORIDE | 18.9 | 6.6  | 4.7  | 16.00 | 246.70 | 1 | \$     | 0.46 | 0.43 |
| 4-ACETYLMORPHOLINE       | 17.4 | 5.2  | 7.1  | 14.50 | 207.97 | 2 | \$\$   | 0.21 | 0.19 |
| 2,6-DICHLOROANISOLE      | 18.8 | 8.2  | 5.9  | 10.10 | 205.93 | 1 | \$\$\$ | 0.34 | 0.34 |
| ETHYLENE DIBROMIDE       | 18.3 | 3.4  | 7.9  | 10.00 | 131.00 | 3 | \$     | 0.79 | 0.75 |
| ETHYL CINNAMATE          | 17.5 | 8.0  | 3.7  | 7.75  | 271.75 | 1 | \$     | 0.51 | 0.43 |
| p-CHLOROTOLUENE          | 18.2 | 6.1  | 2.4  | 7.50  | 162.50 | 1 | \$     | 1.03 | 0.87 |
| HEXAMETHYLPHOSPHORAMIDE  | 17.6 | 8.4  | 10.3 | 7.10  | 235.00 | 3 | \$\$   | 1.06 | 0.90 |
| 2,5-DIMETHYLPYRROLE      | 17.4 | 7.5  | 6.2  | 6.50  | 171.00 | 2 | \$\$\$ | 0.06 | 0.04 |
| NITROBENZENE             | 19.0 | 8.4  | 3.7  | 5.76  | 210.80 | 3 | \$     | 0.88 | 0.80 |
| METHYLENE DIIODIDE       | 16.9 | 3.8  | 5.0  | 5.20  | 181.00 | 2 | \$\$   | 0.76 | 0.69 |
| 4-BROMOPHENETOLE         | 18.6 | 7.6  | 4.8  | 4.00  | 230.85 | 1 | \$     | 0.29 | 0.27 |
| DIBENZYL ETHER           | 16.5 | 3.6  | 6.7  | 3.60  | 288.30 | 2 | \$     | 0.95 | 0.86 |
| DIMETHYL PHTHALATE       | 17.7 | 10.6 | 4.5  | 2.00  | 284.00 | 1 | \$     | 0.95 | 0.88 |
| o-DIBROMOBENZENE         | 19.7 | 6.4  | 4.8  | 1.80  | 221.00 | - | \$\$   | 0.94 | 0.88 |
| o-BROMOANISOLE           | 18.8 | 8.2  | 6.1  | 1.30  | 216.00 | 2 | \$     | 0.34 | 0.33 |

24

25

26 **Table 3A** PLA dissolution candidates and evaluated data, for PLA HSP taken from <sup>3</sup>

| Solvent                              | $\delta_D$<br>(Heated)<br>(Mpa <sup>1/2</sup> ) | $\delta_P$<br>(Heated)<br>(Mpa <sup>1/2</sup> ) | $\delta_H$<br>(Heated)<br>(Mpa <sup>1/2</sup> ) | $T_m$ (°C) | $T_b$ (°C) | Toxicity | Costs  | RED  | RED<br>(Heated) |
|--------------------------------------|-------------------------------------------------|-------------------------------------------------|-------------------------------------------------|------------|------------|----------|--------|------|-----------------|
| 2,4,5-TRICHLOROTHIOPHENOL            | 20.0                                            | 4.4                                             | 8.3                                             | 117.00     | -          | 1        | \$\$\$ | 0.59 | 0.54            |
| 3-METHYLINDOLE                       | 19.0                                            | 7.0                                             | 5.7                                             | 95.00      | 265.00     | 1        | \$\$\$ | 0.50 | 0.49            |
| NAPHTHALENE                          | 18.3                                            | 2.0                                             | 5.4                                             | 80.28      | 217.99     | 3        | \$     | 0.30 | 0.27            |
| 2,4,6-TRICHLOROPHENOL                | 19.3                                            | 5.0                                             | 9.9                                             | 69.50      | 244.50     | 3        | \$     | 0.95 | 0.82            |
| TRICHLOROBIPHENYL                    | 18.3                                            | 5.2                                             | 3.7                                             | 61.15      | 347.50     | 3        | \$\$\$ | 0.49 | 0.42            |
| 2,4-DICHLORO-5-NITROBENZOTRIFLUORIDE | 18.9                                            | 7.5                                             | 3.4                                             | 55.00      | -          | 1        | \$\$   | 1.10 | 1.00            |
| INDOLE                               | 18.8                                            | 7.4                                             | 5.9                                             | 53.00      | 253.00     | 2        | \$     | 0.61 | 0.59            |
| p-DICHLOROBENZENE                    | 18.8                                            | 5.5                                             | 2.5                                             | 52.99      | 174.06     | 3        | \$     | 0.93 | 0.79            |
| o-CHLOROTHIOPHENOL                   | 19.2                                            | 6.9                                             | 9.1                                             | 49.00      | 205.00     | 2        | \$\$   | 1.03 | 0.93            |
| 4-CHLOROBENZALDEHYDE                 | 18.9                                            | 7.1                                             | 5.1                                             | 47.50      | 213.50     | 2        | \$     | 0.57 | 0.55            |
| p-BROMOBENZOYL CHLORIDE              | 19.2                                            | 6.4                                             | 5.0                                             | 42.00      | 247.00     | 2        | \$     | 0.42 | 0.40            |
| 3,4-DICHLORONITROBENZENE             | 19.1                                            | 7.1                                             | 3.7                                             | 41.00      | 255.00     | -        | \$\$\$ | 0.87 | 0.80            |
| PENTAFLUOROBENZOPHENONE              | 18.4                                            | 7.9                                             | 4.9                                             | 37.00      | -          | 2        | \$     | 0.98 | 0.92            |
| 5-BROMO-2-NITROBENZOTRIFLUORIDE      | 19.0                                            | 5.9                                             | 4.5                                             | 34.00      | 95.00      | 1        | \$\$\$ | 0.37 | 0.34            |
| METHYL P-TOLUATE                     | 18.1                                            | 6.4                                             | 3.5                                             | 34.00      | 218.15     | 1        | \$     | 0.86 | 0.75            |
| 4-(TRIFLUOROMETHYL) ACETOPHENONE     | 17.9                                            | 6.0                                             | 3.2                                             | 31.50      | 180.98     | 1        | \$\$\$ | 0.93 | 0.80            |
| p-DIVINYLBENZENE                     | 17.7                                            | 1.0                                             | 6.4                                             | 31.00      | 200.55     | 2        | \$\$\$ | 0.74 | 0.67            |
| 2,6-DICHLOROANISOLE                  | 18.9                                            | 8.2                                             | 5.9                                             | 31.00      | 205.93     | 2        | \$\$   | 0.97 | 0.94            |
| DIPHENYL ETHER                       | 18.7                                            | 3.1                                             | 5.3                                             | 26.88      | 258.31     | 2        | \$     | 0.08 | 0.07            |
| p-BROMOTOLUENE                       | 18.4                                            | 6.7                                             | 3.7                                             | 26.80      | 184.35     | 1        | \$     | 0.78 | 0.69            |
| 2-BROMOTHIOPHENE                     | 19.1                                            | 5.1                                             | 4.2                                             | 25.00      | 150.00     | 2        | \$     | 0.31 | 0.28            |
| 4-VINYLPYRIDINE                      | 17.2                                            | 7.1                                             | 6.2                                             | 25.00      | 62.00      | 3        | \$     | 1.09 | 0.98            |

27

28

29

30 **Table 3B** PLA dissolution candidates and evaluated data, for PLA HSP taken from <sup>3</sup> – continuation

|                          |      |     |     |       |        |   |        |      |      |
|--------------------------|------|-----|-----|-------|--------|---|--------|------|------|
| TRANS-ANETHOLE           | 18.1 | 4.2 | 7.9 | 22.20 | 235.50 | 1 | \$     | 0.33 | 0.27 |
| 1-CHLORO-4-ETHOXYBENZENE | 18.4 | 6.2 | 4.0 | 21.00 | 213.00 | 2 | \$\$\$ | 0.58 | 0.51 |
| p-CHLOROACETOPHENONE     | 18.7 | 7.5 | 3.7 | 20.00 | 232.00 | 2 | \$     | 1.02 | 0.93 |
| PENTAMETHYLENE SULFIDE   | 17.6 | 6.2 | 8.1 | 19.00 | 142.00 | 2 | \$\$\$ | 0.84 | 0.74 |
| 1,2,4-TRICHLOROBENZENE   | 19.2 | 5.9 | 2.9 | 16.89 | 213.50 | 2 | \$     | 0.84 | 0.74 |
| p-CHLOROBENZOYL CHLORIDE | 18.9 | 6.6 | 4.7 | 16.00 | 246.70 | 1 | \$     | 0.49 | 0.46 |
| 4-ACETYLMORPHOLINE       | 17.4 | 5.2 | 7.1 | 14.50 | 207.97 | 2 | \$\$   | 0.60 | 0.51 |
| 1,4-DIOXANE              | 18.1 | 1.8 | 6.8 | 11.77 | 101.28 | 3 | \$     | 0.39 | 0.35 |
| 2,6-DICHLOROANISOLE      | 18.8 | 8.2 | 5.9 | 10.10 | 205.93 | 1 | \$\$\$ | 0.97 | 0.94 |
| ETHYLENE DIBROMIDE       | 18.3 | 3.4 | 7.9 | 10.00 | 131.00 | 3 | \$     | 0.27 | 0.22 |
| BROMOFORM                | 20.4 | 4.0 | 5.6 | 9.00  | 149.50 | 2 | \$\$   | 0.53 | 0.51 |
| 2,5-DIMETHYLPYRROLE      | 17.4 | 7.5 | 6.2 | 6.50  | 171.00 | 2 | \$\$\$ | 1.10 | 1.00 |
| 4-CHLOROBENZOTRICHLORIDE | 19.3 | 5.4 | 3.2 | 5.80  | 245.00 | 3 | \$     | 0.67 | 0.59 |
| METHYLENE DIIODIDE       | 16.9 | 3.8 | 5.0 | 5.20  | 181.00 | 2 | \$\$   | 0.87 | 0.74 |
| 4-BROMOPHENETOLE         | 18.6 | 7.6 | 4.8 | 4.00  | 230.85 | 1 | \$     | 0.80 | 0.75 |
| o-DIBROMOBENZENE         | 19.7 | 6.4 | 4.8 | 1.80  | 221.00 | - | \$\$   | 0.57 | 0.55 |
| o-BROMOANISOLE           | 18.8 | 8.2 | 6.1 | 1.30  | 216.00 | 2 | \$     | 0.97 | 0.93 |

31

32

33

34 **Table 4A** PLA dissolution candidates and data, for PLA HSP taken from <sup>4</sup>

| <b>Solvent</b>                   | <b><math>\delta_D</math><br/>(Heated)<br/>(Mpa<sup>1/2</sup>)</b> | <b><math>\delta_P</math><br/>(Heated)<br/>(Mpa<sup>1/2</sup>)</b> | <b><math>\delta_H</math><br/>(Heated)<br/>(Mpa<sup>1/2</sup>)</b> | <b><math>T_m</math> (°C)</b> | <b><math>T_b</math> (°C)</b> | <b>Toxicity</b> | <b>Costs</b> | <b>RED</b> | <b>RED<br/>(Heated)</b> |
|----------------------------------|-------------------------------------------------------------------|-------------------------------------------------------------------|-------------------------------------------------------------------|------------------------------|------------------------------|-----------------|--------------|------------|-------------------------|
| BENZOIC ACID                     | 17.3                                                              | 6.8                                                               | 9.0                                                               | 122.37                       | 249.05                       | 2               | \$           | 0.59       | 0.53                    |
| 2,4,5-TRICHLOROTHIOPHENOL        | 20.0                                                              | 4.4                                                               | 8.3                                                               | 117.00                       | -                            | 1               | \$\$\$       | 1.01       | 0.95                    |
| 3-METHYLINDOLE                   | 19.0                                                              | 7.0                                                               | 5.7                                                               | 95.00                        | 265.00                       | 1               | \$\$\$       | 0.66       | 0.63                    |
| NAPHTHALENE                      | 18.3                                                              | 2.0                                                               | 5.4                                                               | 80.28                        | 217.99                       | 3               | \$           | 0.51       | 0.47                    |
| TETRAMETHYLTHIOUREA              | 16.5                                                              | 5.9                                                               | 9.6                                                               | 79.30                        | 245.00                       | 2               | \$\$         | 1.01       | 0.87                    |
| 2,4,6-TRICHLOROPHENOL            | 19.3                                                              | 5.0                                                               | 9.9                                                               | 69.50                        | 244.50                       | 3               | \$           | 0.92       | 0.83                    |
| TRICHLOROBIPHENYL                | 18.3                                                              | 5.2                                                               | 3.7                                                               | 61.15                        | 347.50                       | 3               | \$\$\$       | 0.66       | 0.56                    |
| METHOXY ANILINE                  | 18.9                                                              | 6.4                                                               | 10.3                                                              | 57.70                        | 243.00                       | 3               | \$           | 1.07       | 0.95                    |
| TRICHLOROACETIC ACID             | 17.4                                                              | 5.7                                                               | 10.4                                                              | 56.85                        | 197.63                       | 2               | \$\$\$       | 0.86       | 0.72                    |
| INDOLE                           | 18.8                                                              | 7.4                                                               | 5.9                                                               | 53.00                        | 253.00                       | 2               | \$           | 0.65       | 0.63                    |
| o-CHLOROTHIOPHENOL               | 19.2                                                              | 6.9                                                               | 9.1                                                               | 49.00                        | 205.00                       | 2               | \$\$         | 0.92       | 0.86                    |
| 4-CHLOROBENZALDEHYDE             | 18.9                                                              | 7.1                                                               | 5.1                                                               | 47.50                        | 213.50                       | 2               | \$           | 0.75       | 0.70                    |
| p-BROMOBENZOYL CHLORIDE          | 19.2                                                              | 6.4                                                               | 5.0                                                               | 42.00                        | 247.00                       | 2               | \$           | 0.75       | 0.70                    |
| PENTAFLUOROBENZOPHENONE          | 18.4                                                              | 7.9                                                               | 4.9                                                               | 37.00                        | -                            | 2               | \$           | 0.89       | 0.83                    |
| 5-BROMO-2-NITROBENZOTRIFLUORIDE  | 19.0                                                              | 5.9                                                               | 4.5                                                               | 34.00                        | 95.00                        | 1               | \$\$\$       | 0.71       | 0.65                    |
| METHYL P-TOLUATE                 | 18.1                                                              | 6.4                                                               | 3.5                                                               | 34.00                        | 218.15                       | 1               | \$           | 0.91       | 0.78                    |
| 4-(TRIFLUOROMETHYL) ACETOPHENONE | 17.9                                                              | 6.0                                                               | 3.2                                                               | 31.50                        | 180.98                       | 1               | \$\$\$       | 0.96       | 0.81                    |
| p-DIVINYLBENZENE                 | 17.7                                                              | 1.0                                                               | 6.4                                                               | 31.00                        | 200.55                       | 2               | \$\$\$       | 0.69       | 0.65                    |
| 2,6-DICHLOROANISOLE              | 18.9                                                              | 8.2                                                               | 5.9                                                               | 31.00                        | 205.93                       | 2               | \$\$         | 0.99       | 0.95                    |
| DIPHENYL ETHER                   | 18.7                                                              | 3.1                                                               | 5.3                                                               | 26.88                        | 258.31                       | 2               | \$           | 0.37       | 0.34                    |
| p-BROMOTOLUENE                   | 18.4                                                              | 6.7                                                               | 3.7                                                               | 26.80                        | 184.35                       | 1               | \$           | 0.89       | 0.78                    |

35

36

37



38 **Table 4B** PLA dissolution candidates and data, for PLA HSP taken from <sup>4</sup> – continuation

|                          |      |     |     |       |        |   |        |      |      |
|--------------------------|------|-----|-----|-------|--------|---|--------|------|------|
| 4-VINYLPYRIDINE          | 17.2 | 7.1 | 6.2 | 25.00 | 62.00  | 3 | \$     | 0.49 | 0.45 |
| 2-BROMOTHIOPHENE         | 19.1 | 5.1 | 4.2 | 25.00 | 150.00 | 2 | \$     | 0.77 | 0.69 |
| TRANS-ANETHOLE           | 18.1 | 4.2 | 7.9 | 22.20 | 235.50 | 1 | \$     | 0.07 | 0.06 |
| 1-CHLORO-4-ETHOXYBENZENE | 18.4 | 6.2 | 4.0 | 21.00 | 213.00 | 2 | \$\$\$ | 0.69 | 0.61 |
| PENTAMETHYLENE SULFIDE   | 17.6 | 6.2 | 8.1 | 19.00 | 142.00 | 2 | \$\$\$ | 0.25 | 0.23 |
| p-CHLOROBENZOYL CHLORIDE | 18.9 | 6.6 | 4.7 | 16.00 | 246.70 | 1 | \$     | 0.74 | 0.68 |
| 4-ACETYLMORPHOLINE       | 17.4 | 5.2 | 7.1 | 14.50 | 207.97 | 2 | \$\$   | 0.09 | 0.07 |
| 1,4-DIOXANE              | 18.1 | 1.8 | 6.8 | 11.77 | 101.28 | 3 | \$     | 0.40 | 0.39 |
| 2,6-DICHLOROANISOLE      | 18.8 | 8.2 | 5.9 | 10.10 | 205.93 | 1 | \$\$\$ | 0.95 | 0.92 |
| ETHYLENE DIBROMIDE       | 18.3 | 3.4 | 7.9 | 10.00 | 131.00 | 3 | \$     | 0.13 | 0.13 |
| 1-DECANOL                | 16.7 | 2.5 | 9.1 | 6.75  | 229.85 | 2 | \$     | 0.87 | 0.75 |
| 2,5-DIMETHYLPYRROLE      | 17.4 | 7.5 | 6.2 | 6.50  | 171.00 | 2 | \$\$\$ | 0.55 | 0.51 |
| METHYLENE DIIODIDE       | 16.9 | 3.8 | 5.0 | 5.20  | 181.00 | 2 | \$\$   | 0.48 | 0.40 |
| 4-BROMOPHENETOLE         | 18.6 | 7.6 | 4.8 | 4.00  | 230.85 | 1 | \$     | 0.82 | 0.76 |
| DIBENZYL ETHER           | 16.5 | 3.6 | 6.7 | 3.60  | 288.30 | 2 | \$\$   | 0.55 | 0.46 |
| o-BROMOANISOLE           | 18.8 | 8.2 | 6.1 | 1.30  | 216.00 | 2 | \$     | 0.93 | 0.90 |

39

40

41 **Table 5A** PLA dissolution candidates and data, for PLA HSP taken from <sup>5</sup>

| Solvent                              | $\delta_D$<br>(Heated)<br>(Mpa <sup>1/2</sup> ) | $\delta_P$<br>(Heated)<br>(Mpa <sup>1/2</sup> ) | $\delta_H$<br>(Heated)<br>(Mpa <sup>1/2</sup> ) | $T_m$ (°C) | $T_b$ (°C) | Toxicity | Costs  | RED  | RED<br>(Heated) |
|--------------------------------------|-------------------------------------------------|-------------------------------------------------|-------------------------------------------------|------------|------------|----------|--------|------|-----------------|
| p-BROMONITROBENZENE                  | 19.9                                            | 9.7                                             | 5.4                                             | 127.00     | 256.00     | 1        | \$\$\$ | 1.06 | 1.00            |
| p-BROMOBENZONITRILE                  | 19.4                                            | 9.1                                             | 5.3                                             | 113.00     | 237.00     | 2        | \$\$   | 0.67 | 0.64            |
| 4-CHLOROBENZONITRILE                 | 18.6                                            | 7.8                                             | 3.7                                             | 95.00      | 223.00     | 2        | \$\$   | 0.52 | 0.49            |
| 3-METHYLINDOLE                       | 19.0                                            | 7.0                                             | 5.7                                             | 95.00      | 265.00     | 1        | \$\$\$ | 0.79 | 0.76            |
| 3,5-DIFLUOROBENZONITRILE             | 17.9                                            | 11.0                                            | 2.9                                             | 86.50      | 188.63     | 2        | \$\$\$ | 0.48 | 0.42            |
| p-CHLORONITROBENZENE                 | 19.4                                            | 9.4                                             | 3.8                                             | 83.50      | 242.00     | 3        | \$     | 0.81 | 0.76            |
| 2,4-DICHLOROBENZALDEHYDE             | 18.8                                            | 8.6                                             | 4.9                                             | 71.00      | 233.00     | 1        | \$     | 0.32 | 0.31            |
| 1,3,5-TRIOXANE                       | 17.8                                            | 9.0                                             | 7.9                                             | 64.00      | 114.50     | 2        | \$     | 0.36 | 0.31            |
| 2,3-DICHLORONITROBENZENE             | 18.8                                            | 12.4                                            | 4.0                                             | 62.00      | 258.00     | 2        | \$\$\$ | 0.73 | 0.70            |
| 2,4-DICHLORO-5-NITROBENZOTRIFLUORIDE | 18.9                                            | 7.5                                             | 3.4                                             | 55.00      | -          | 1        | \$\$   | 0.87 | 0.80            |
| INDOLE                               | 18.8                                            | 7.4                                             | 5.9                                             | 53.00      | 253.00     | 2        | \$     | 0.59 | 0.57            |
| p-NITROTOLUENE                       | 19.1                                            | 9.4                                             | 3.6                                             | 51.60      | 238.50     | 3        | \$     | 0.68 | 0.62            |
| 4-CHLOROBENZALDEHYDE                 | 18.9                                            | 7.1                                             | 5.1                                             | 47.50      | 213.50     | 2        | \$     | 0.71 | 0.69            |
| 3,4-DICHLORONITROBENZENE             | 19.1                                            | 7.1                                             | 3.7                                             | 41.00      | 255.00     | -        | \$\$\$ | 1.00 | 0.93            |
| 4-CHLORO-2-NITROTOLUENE              | 18.9                                            | 11.6                                            | 3.5                                             | 36.54      | 266.35     | 1        | \$     | 0.76 | 0.71            |
| 3,4-DICHLOROPHENYLACETONITRILE       | 19.5                                            | 10.6                                            | 4.0                                             | 38.00      | -          | 2        | \$\$   | 0.89 | 0.84            |
| 4-METHOXYACETOPHENONE                | 18.0                                            | 11.0                                            | 6.4                                             | 37.50      | 255.00     | 1        | \$\$   | 0.15 | 0.15            |
| 4-ETHOXYACETOPHENONE                 | 17.9                                            | 10.1                                            | 5.8                                             | 37.00      | 268.50     | 2        | \$\$\$ | 0.02 | 0.03            |
| PENTAFLUOROBENZOPHENONE              | 18.4                                            | 7.9                                             | 4.9                                             | 37.00      | -          | 2        | \$     | 0.28 | 0.27            |
| 1,3-DICHLORO-2-FLUOROBENZENE         | 18.5                                            | 8.9                                             | 2.5                                             | 37.00      | -          | 1        | \$\$\$ | 0.70 | 0.61            |
| 6-CHLORO-2-NITROTOLUENE              | 19.3                                            | 9.4                                             | 3.5                                             | 34.00      | 238.00     | 2        | \$     | 0.82 | 0.76            |

42

43

44

45 **Table 5B** PLA dissolution candidates and data, for PLA HSP taken from <sup>5</sup> – continuation

|                                  |      |      |     |       |        |   |        |      |      |
|----------------------------------|------|------|-----|-------|--------|---|--------|------|------|
| METHYL P-TOLUATE                 | 18.1 | 6.4  | 3.5 | 34.00 | 218.15 | 1 | \$     | 0.85 | 0.79 |
| 4-(TRIFLUOROMETHYL) ACETOPHENONE | 17.9 | 6.0  | 3.2 | 31.50 | 180.98 | 1 | \$\$\$ | 1.04 | 0.96 |
| 2,6-DICHLOROANISOLE              | 18.9 | 8.2  | 5.9 | 31.00 | 205.93 | 2 | \$\$   | 0.46 | 0.45 |
| 2,6-DIFLUOROBENZONITRILE         | 17.9 | 11.0 | 2.9 | 30.00 | 197.00 | 2 | \$\$\$ | 0.48 | 0.42 |
| CYCLOOCTANONE                    | 16.2 | 9.4  | 4.1 | 29.00 | 196.00 | 2 | \$     | 0.63 | 0.53 |
| 2,4-DICHLORONITROBENZENE         | 19.4 | 8.5  | 3.8 | 29.00 | 258.00 | 3 | \$     | 0.88 | 0.82 |
| p-BROMOTOLUENE                   | 18.4 | 6.7  | 3.7 | 26.80 | 184.35 | 1 | \$     | 0.76 | 0.71 |
| 4-VINYLPYRIDINE                  | 17.2 | 7.1  | 6.2 | 25.00 | 62.00  | 3 | \$     | 0.45 | 0.41 |
| CYCLOHEPTANONE                   | 16.4 | 10.4 | 4.4 | 25.00 | 178.50 | 1 | \$\$   | 0.49 | 0.41 |
| DIISOPROPYL METHYLPHOSPHONATE    | 15.6 | 9.8  | 5.2 | 25.00 | 121.10 | 2 | \$\$\$ | 0.97 | 0.84 |
| DIPROPYL SULFOXIDE               | 16.2 | 12.7 | 6.8 | 24.75 | 201.85 | 1 | \$\$\$ | 1.09 | 0.98 |
| 2-CHLOROCYCLOHEXANONE            | 17.6 | 12.7 | 4.7 | 23.00 | 161.50 | 1 | \$\$\$ | 0.52 | 0.50 |
| CYCLODECANONE                    | 16.0 | 7.8  | 3.7 | 22.85 | 236.05 | 1 | \$\$\$ | 1.01 | 0.87 |
| 1-CHLORO-4-ETHOXYBENZENE         | 18.4 | 6.2  | 4.0 | 21.00 | 213.00 | 2 | \$\$\$ | 0.87 | 0.83 |
| p-CHLOROACETOPHENONE             | 18.7 | 7.5  | 3.7 | 20.00 | 232.00 | 2 | \$     | 0.66 | 0.62 |
| ACETOPHENONE                     | 18.7 | 8.4  | 3.4 | 19.45 | 202.11 | 1 | \$     | 0.55 | 0.50 |
| PENTAMETHYLENE SULFIDE           | 17.6 | 6.2  | 8.1 | 19.00 | 142.00 | 2 | \$\$\$ | 1.07 | 0.97 |
| p-CHLOROBENZOYL CHLORIDE         | 18.9 | 6.6  | 4.7 | 16.00 | 246.70 | 1 | \$     | 0.89 | 0.85 |
| VINYL PYRROLIDONE                | 15.6 | 9.1  | 5.4 | 13.00 | 219.00 | 3 | \$     | 0.99 | 0.85 |
| TRICRESYL PHOSPHATE              | 18.1 | 12.1 | 4.1 | 11.00 | 410.00 | 3 | \$     | 0.43 | 0.41 |
| 2,6-DICHLOROANISOLE              | 18.8 | 8.2  | 5.9 | 10.10 | 205.93 | 1 | \$\$\$ | 0.41 | 0.40 |
| 2,4-DIFLUORONITROBENZENE         | 18.5 | 10.8 | 3.4 | 9.00  | 203.00 | 2 | \$\$   | 0.45 | 0.41 |
| 2,5-DIMETHYLPYRROLE              | 17.4 | 7.5  | 6.2 | 6.50  | 171.00 | 2 | \$\$\$ | 0.31 | 0.29 |

46

47

48

49 **Table 5C** PLA dissolution candidates and data, for PLA HSP taken from <sup>5</sup> – continuation

|                    |      |      |     |      |        |   |    |      |      |
|--------------------|------|------|-----|------|--------|---|----|------|------|
| ETHYL CINNAMATE    | 17.5 | 8.0  | 3.7 | 6.00 | 271.00 | 1 | \$ | 0.33 | 0.29 |
| NITROBENZENE       | 19.0 | 8.4  | 3.7 | 5.76 | 210.80 | 3 | \$ | 0.66 | 0.61 |
| 4-BROMOPHENETOLE   | 18.6 | 7.6  | 4.8 | 4.00 | 230.85 | 1 | \$ | 0.43 | 0.42 |
| o-BROMOANISOLE     | 18.8 | 8.2  | 6.1 | 1.30 | 216.00 | 2 | \$ | 0.43 | 0.41 |
| DIMETHYL PHTHALATE | 17.7 | 10.6 | 4.5 | 1.03 | 283.70 | 1 | \$ | 0.10 | 0.09 |

50

51 **2. SUPPLEMENTARY MEASUREMENT DATA**

52

53 **Table 6** Cloud point measurement data used in the PCL/MPTOL phase diagram construction, where  $\phi_{\text{PCL}}$  stands for volume fraction of PCL in the solution,  $T_{\text{cloud}}$  stands for  
54 measured cloud point temperature and  $T_{\text{dev}}$  stand for corresponding standard deviation of measured  $T_{\text{cloud}}$ .

|                         |        |        |        |       |        |       |       |       |       |       |       |       |       |       |       |        |        |
|-------------------------|--------|--------|--------|-------|--------|-------|-------|-------|-------|-------|-------|-------|-------|-------|-------|--------|--------|
| $\phi_{\text{PCL}}$ (-) | 0.045  | 0.065  | 0.084  | 0.090 | 0.093  | 0.093 | 0.111 | 0.112 | 0.116 | 0.133 | 0.139 | 0.151 | 0.159 | 0.169 | 0.178 | 0.188  | 0.206  |
| $T_{\text{cloud}}$ (°C) | -4.380 | -3.090 | -2.000 | 2.210 | -0.430 | 3.370 | 1.870 | 2.230 | 2.540 | 4.520 | 4.800 | 7.320 | 6.000 | 9.340 | 8.890 | 10.040 | 10.190 |
| $T_{\text{std}}$ (°C)   | 0.470  | 7.110  | 0.190  | 0.450 | 1.110  | 0.720 | 0.160 | 0.850 | 1.060 | 0.090 | 0.070 | 0.630 | 0.300 | 0.260 | 1.220 | 0.110  | 0.250  |

55

56 **Table 7** Freezing point measurement data used in the PCL/MPTOL phase diagram construction, where  $\phi_{\text{PCL}}$  stands for volume fraction of PCL in the solution,  $T_{\text{freeze}}$  stands for  
57 measured freezing point temperature and  $T_{\text{dev}}$  stand for corresponding standard deviation of measured  $T_{\text{freeze}}$ .

58

|                          |        |        |        |        |        |         |
|--------------------------|--------|--------|--------|--------|--------|---------|
| $\phi_{\text{PCL}}$ (-)  | 0.038  | 0.055  | 0.093  | 0.113  | 0.135  | 0.168   |
| $T_{\text{freeze}}$ (°C) | -3.140 | -0.870 | -3.840 | -8.140 | -9.490 | -11.050 |
| $T_{\text{std}}$ (°C)    | 4.990  | 0.700  | 0.670  | 0.290  | 1.270  | 1.240   |

59

60

61 **Table 8** Porous sample characterization data, where  $d_p$  denotes frequency pore size average,  $A_{\text{pore}}$  stands for specific pore surface area and suffix (<sub>std</sub>) denotes standard  
62 deviation of the respective measurement.

| $w_{\text{PCL}}$ | $d_p$ | $d_{p\text{-std}}$ | Porosity | Porosity <sub>std</sub> | $A_{\text{pore}}$   | $A_{\text{pore-std}}$ |
|------------------|-------|--------------------|----------|-------------------------|---------------------|-----------------------|
| (-)              | (nm)  | (nm)               | (%)      | (%)                     | (m <sup>2</sup> /g) | (m <sup>2</sup> /g)   |
| 0.12             | 58.1  | 28.4               | 71.8     | 2.7                     | 19.8                | 3.7                   |
| 0.14             | 99    | 54.6               | 72.7     | 9.2                     | 18.0                | 3.1                   |
| 0.16             | 64.1  | 48.2               | 74.0     | 7.8                     | 22.4                | 9.1                   |

63

64

65 **Table 9** Data, used in the manuscript, for comparison of PCL solution wt.% influence on pore volume percentage (Vol. perc.) at different pore sizes  $d_p$ . Where values of  $d_p$   
 66 denote pore range in  $\pm 0.5 \mu\text{m}$ , e.g.  $d_p = 0.5 \mu\text{m}$  describes range from 0 – 1  $\mu\text{m}$ .

| 12 PCL wt.%             |                |                              | 14 PCL wt.%             |                |                              | 16 PCL wt.%             |                |                              |
|-------------------------|----------------|------------------------------|-------------------------|----------------|------------------------------|-------------------------|----------------|------------------------------|
| $d_p$ ( $\mu\text{m}$ ) | Vol. perc. (%) | Vol perc. <sub>std</sub> (%) | $d_p$ ( $\mu\text{m}$ ) | Vol. perc. (%) | Vol perc. <sub>std</sub> (%) | $d_p$ ( $\mu\text{m}$ ) | Vol. perc. (%) | Vol perc. <sub>std</sub> (%) |
| 0.5                     | 31.14          | 2.86                         | 0.5                     | 48.58          | 8.79                         | 0.5                     | 38.48          | 5.12                         |
| 1.5                     | 16.30          | 1.58                         | 1.5                     | 20.26          | 0.55                         | 1.5                     | 20.36          | 1.11                         |
| 2.5                     | 10.35          | 0.42                         | 2.5                     | 5.85           | 5.09                         | 2.5                     | 10.83          | 2.18                         |
| 3.5                     | 5.76           | 0.20                         | 3.5                     | 3.13           | 1.01                         | 3.5                     | 4.47           | 0.86                         |
| 4.5                     | 3.21           | 0.28                         | 4.5                     | 1.49           | 0.75                         | 4.5                     | 4.48           | 4.25                         |
| 5.5                     | 3.26           | 0.36                         | 5.5                     | 1.51           | 0.58                         | 5.5                     | 1.62           | 0.72                         |
| 6.5                     | 2.57           | 0.30                         | 6.5                     | 1.09           | 0.49                         | 6.5                     | 1.14           | 0.52                         |
| 7.5                     | 1.88           | 0.16                         | 7.5                     | 0.91           | 0.36                         | 7.5                     | 0.94           | 0.28                         |
| 8.5                     | 1.53           | 0.08                         | 8.5                     | 0.67           | 0.29                         | 8.5                     | 0.76           | 0.27                         |
| 9.5                     | 1.21           | 0.14                         | 9.5                     | 0.62           | 0.17                         | 9.5                     | 0.66           | 0.26                         |
| 10.5                    | 1.05           | 0.07                         | 10.5                    | 0.58           | 0.17                         | 10.5                    | 0.59           | 0.14                         |
| 11.5                    | 0.99           | 0.17                         | 11.5                    | 0.52           | 0.20                         | 11.5                    | 0.53           | 0.20                         |
| 12.5                    | 0.85           | 0.14                         | 12.5                    | 0.44           | 0.18                         | 12.5                    | 0.55           | 0.22                         |
| 13.5                    | 0.83           | 0.09                         | 13.5                    | 0.46           | 0.12                         | 13.5                    | 0.49           | 0.11                         |
| 14.5                    | 0.73           | 0.18                         | 14.5                    | 0.45           | 0.21                         | 14.5                    | 0.45           | 0.13                         |
| 15.5                    | 0.62           | 0.08                         | 15.5                    | 0.41           | 0.08                         | 15.5                    | 0.41           | 0.13                         |
| 16.5                    | 0.61           | 0.05                         | 16.5                    | 0.40           | 0.03                         | 16.5                    | 0.36           | 0.09                         |
| 17.5                    | 0.60           | 0.18                         | 17.5                    | 0.37           | 0.13                         | 17.5                    | 0.36           | 0.10                         |
| 18.5                    | 0.54           | 0.06                         | 18.5                    | 0.36           | 0.12                         | 18.5                    | 0.30           | 0.10                         |
| 19.5                    | 0.52           | 0.08                         | 19.5                    | 0.33           | 0.05                         | 19.5                    | 0.31           | 0.09                         |

67  
 68 **Table 10** Data, used in the manuscript, for comparison of PCL solution pore frequency at different pore sizes  $d_p$ . Where values of  $d_p$  denote pore range in  $\pm 5 \text{ nm}$ , e.g.  
 69  $d_p = 5 \text{ nm}$  describes range from 0 – 10 nm.

| 12 PCL wt.% |               |                              | 14 PCL wt.% |               |                              | 16 PCL wt.% |               |                              |
|-------------|---------------|------------------------------|-------------|---------------|------------------------------|-------------|---------------|------------------------------|
| $d_p$ (nm)  | Frequency (%) | Frequency <sub>std</sub> (%) | $d_p$ (nm)  | Frequency (%) | Frequency <sub>std</sub> (%) | $d_p$ (nm)  | Frequency (%) | Frequency <sub>std</sub> (%) |
| 5           | 35.26         | 23.83                        | 5           | 8.65          | 14.94                        | 5           | 22.04         | 37.95                        |
| 15          | 20.92         | 28.15                        | 15          | 32.88         | 25.77                        | 15          | 23.99         | 24.60                        |
| 25          | 3.32          | 3.29                         | 25          | 8.97          | 14.30                        | 25          | 13.05         | 15.40                        |
| 35          | 4.56          | 4.99                         | 35          | 2.62          | 4.54                         | 35          | 7.37          | 3.34                         |
| 45          | 5.93          | 4.27                         | 45          | 2.86          | 4.96                         | 45          | 4.26          | 3.71                         |
| 55          | 6.38          | 8.15                         | 55          | 5.97          | 7.30                         | 55          | 3.38          | 5.10                         |
| 65          | 5.31          | 5.44                         | 65          | 2.37          | 1.45                         | 65          | 3.40          | 5.10                         |
| 75          | 1.45          | 0.84                         | 75          | 2.74          | 3.88                         | 75          | 2.86          | 4.14                         |

|     |      |      |     |      |      |     |      |      |
|-----|------|------|-----|------|------|-----|------|------|
| 85  | 2.79 | 2.95 | 85  | 4.95 | 5.26 | 85  | 3.15 | 4.69 |
| 95  | 2.03 | 0.58 | 95  | 1.75 | 1.27 | 95  | 1.21 | 1.46 |
| 105 | 2.25 | 2.13 | 105 | 2.33 | 3.00 | 105 | 1.85 | 2.62 |
| 115 | 0.50 | 0.45 | 115 | 0.92 | 1.13 | 115 | 1.39 | 1.90 |
| 125 | 0.66 | 0.61 | 125 | 1.42 | 2.08 | 125 | 1.43 | 2.06 |
| 135 | 1.04 | 1.34 | 135 | 0.95 | 0.66 | 135 | 0.86 | 1.12 |
| 145 | 0.51 | 0.39 | 145 | 1.09 | 0.90 | 145 | 0.65 | 0.76 |
| 155 | 0.51 | 0.28 | 155 | 0.72 | 0.66 | 155 | 0.78 | 0.93 |
| 165 | 0.58 | 0.43 | 165 | 0.75 | 0.42 | 165 | 0.73 | 0.75 |
| 175 | 0.43 | 0.33 | 175 | 0.68 | 0.66 | 175 | 0.62 | 0.83 |
| 185 | 0.41 | 0.36 | 185 | 0.73 | 0.59 | 185 | 0.47 | 0.72 |
| 195 | 0.33 | 0.30 | 195 | 0.56 | 0.32 | 195 | 0.48 | 0.65 |
| 205 | 0.34 | 0.21 | 205 | 0.45 | 0.24 | 205 | 0.38 | 0.49 |
| 215 | 0.32 | 0.25 | 215 | 0.42 | 0.22 | 215 | 0.32 | 0.44 |
| 225 | 0.26 | 0.19 | 225 | 0.40 | 0.21 | 225 | 0.29 | 0.37 |
| 235 | 0.25 | 0.21 | 235 | 0.52 | 0.45 | 235 | 0.29 | 0.37 |
| 245 | 0.19 | 0.16 | 245 | 0.53 | 0.45 | 245 | 0.26 | 0.32 |
| 255 | 0.17 | 0.14 | 255 | 0.39 | 0.22 | 255 | 0.29 | 0.38 |
| 265 | 0.19 | 0.15 | 265 | 0.32 | 0.19 | 265 | 0.19 | 0.24 |
| 275 | 0.15 | 0.12 | 275 | 0.68 | 0.92 | 275 | 0.23 | 0.30 |
| 285 | 0.17 | 0.14 | 285 | 1.46 | 2.30 | 285 | 0.19 | 0.24 |
| 295 | 0.13 | 0.09 | 295 | 2.62 | 4.28 | 295 | 0.18 | 0.23 |
| 305 | 0.12 | 0.08 | 305 | 2.04 | 3.28 | 305 | 0.18 | 0.22 |
| 315 | 0.12 | 0.10 | 315 | 1.36 | 2.12 | 315 | 0.16 | 0.21 |
| 325 | 0.10 | 0.08 | 325 | 0.68 | 0.94 | 325 | 0.15 | 0.19 |
| 335 | 0.11 | 0.09 | 335 | 0.35 | 0.41 | 335 | 0.11 | 0.13 |
| 345 | 0.09 | 0.08 | 345 | 0.21 | 0.18 | 345 | 0.11 | 0.13 |
| 355 | 0.09 | 0.08 | 355 | 0.18 | 0.11 | 355 | 0.14 | 0.18 |
| 365 | 0.08 | 0.08 | 365 | 0.16 | 0.12 | 365 | 0.10 | 0.14 |
| 375 | 0.07 | 0.04 | 375 | 0.15 | 0.12 | 375 | 0.10 | 0.14 |
| 385 | 0.08 | 0.07 | 385 | 0.16 | 0.11 | 385 | 0.08 | 0.08 |
| 395 | 0.05 | 0.04 | 395 | 0.14 | 0.10 | 395 | 0.10 | 0.13 |

70

71

72 **3. UNPROCESSED SEM IMAGES USED IN MANUSCRIPT**

73

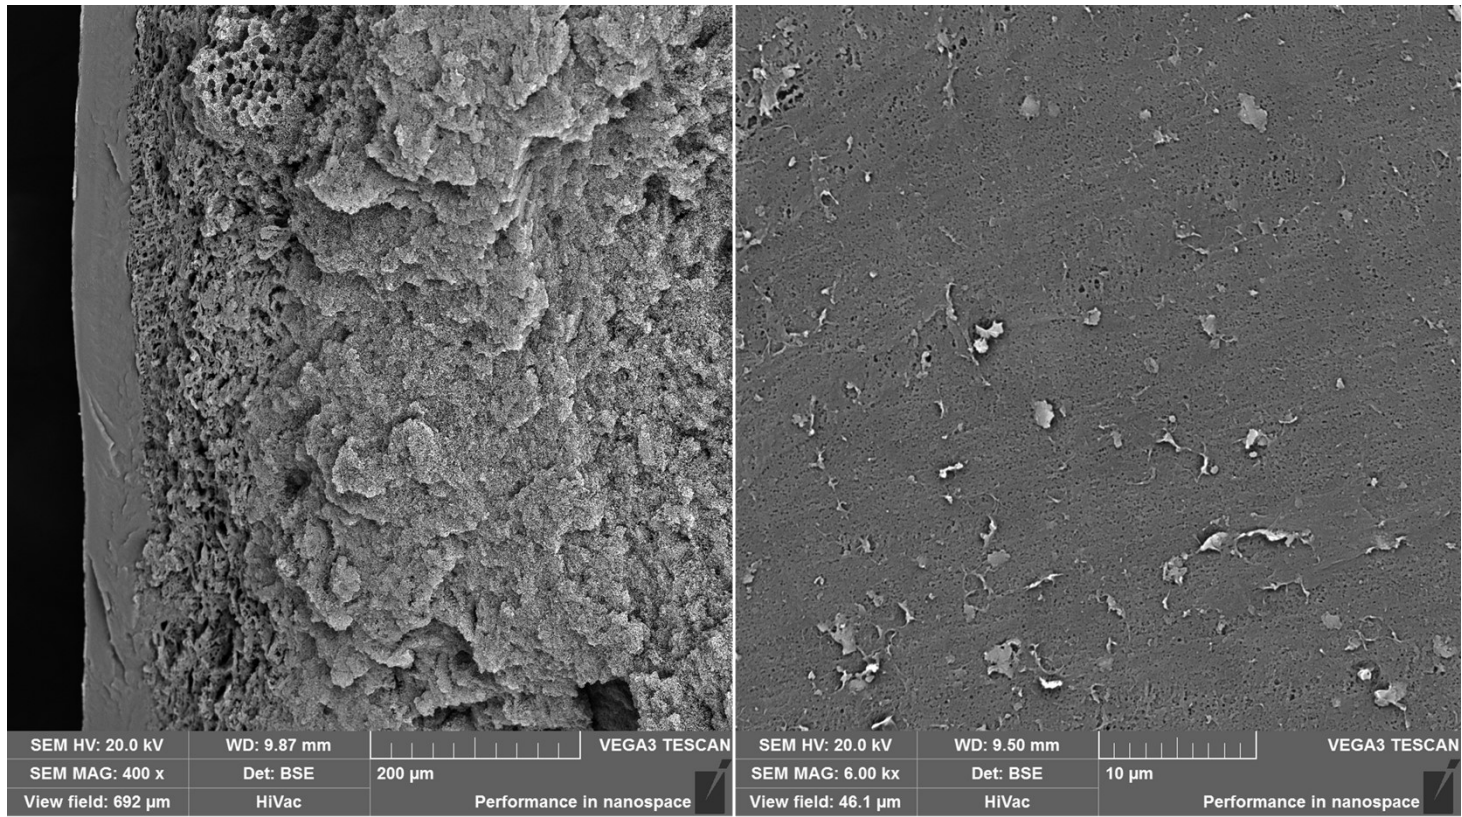

74

75 **Figure 1** unprocessed SEM images used in the manuscript to describe spatial morphology differences.

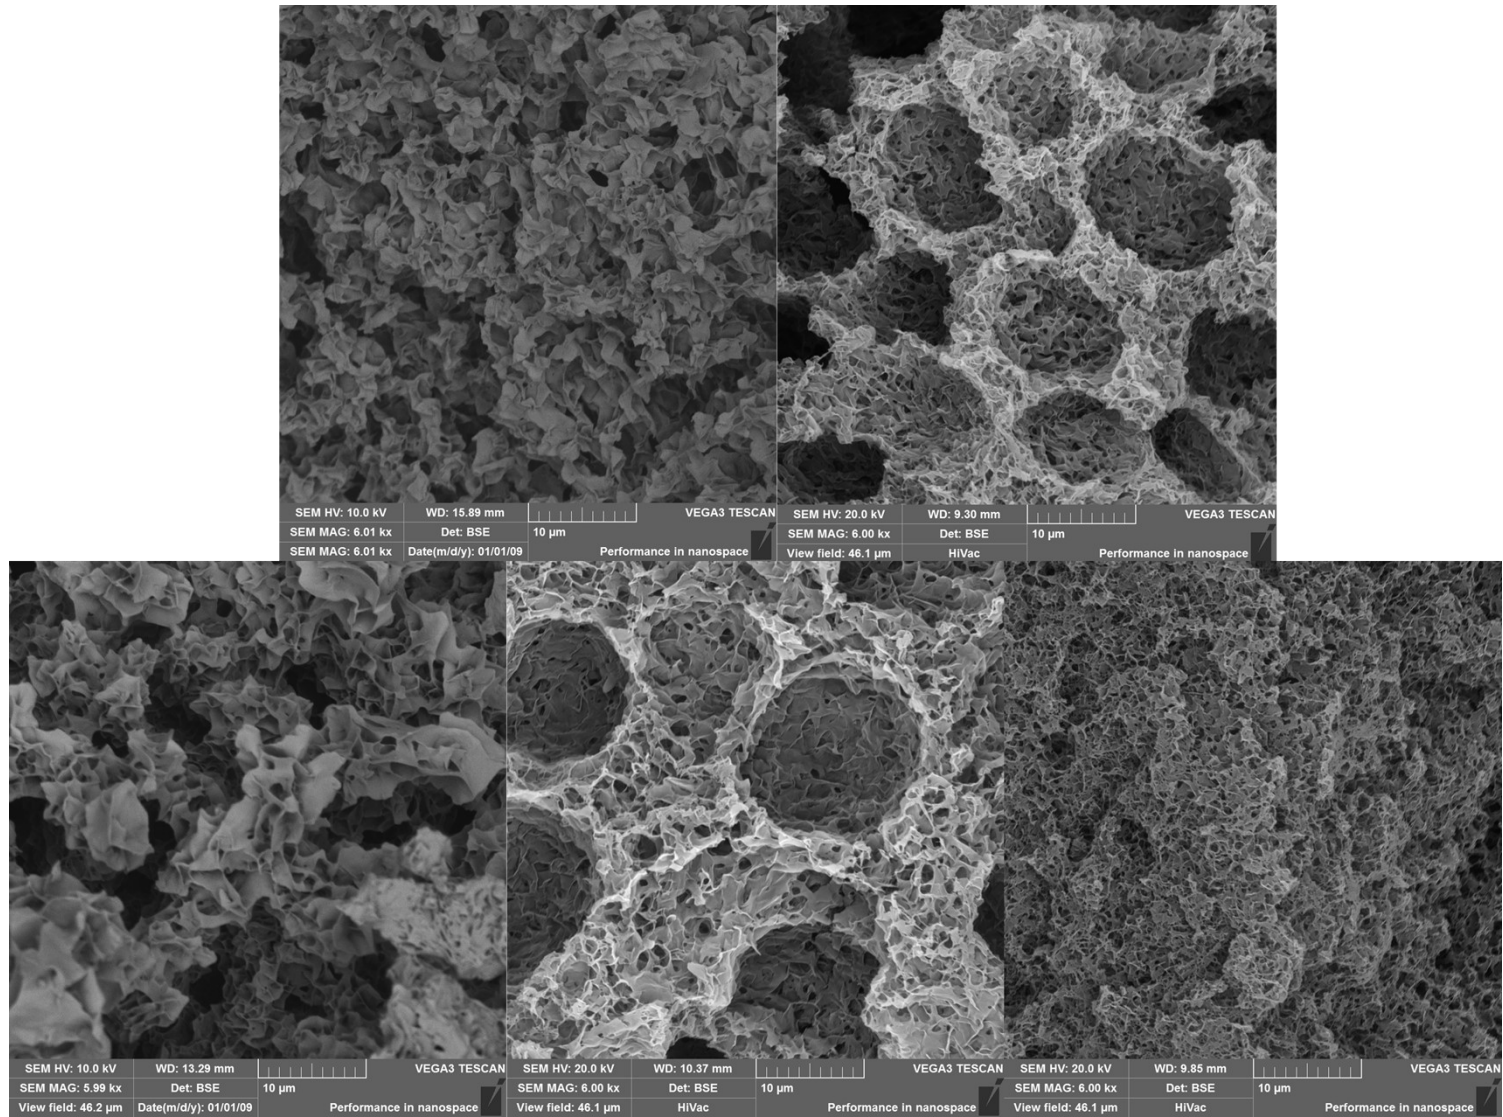

76

77 **Figure 2** unprocessed SEM images used in the manuscript for description of PCL concentration influence on morphology.

78



80 **4. REFERENCES**

- 81 1. C. Bordes, V. Fréville, E. Ruffin, P. Marote, J. Y. Gauvrit, S. Briançon and P. Lantéri, *International Journal of Pharmaceutics*, 2010, **383**, 236-243.
- 82 2. C. Hansen, <https://www.hansen-solubility.com/HSP-science/sphere.php>, (accessed 10<sup>th</sup> June, 2024).
- 83 3. K. Adamska, A. Voelkel and A. Berlińska, *Journal of Pharmaceutical and Biomedical Analysis*, 2016, **127**, 202-206.
- 84 4. M. Esmaeili, G. Pircheraghi, R. Bagheri and V. Altstädt, *Polymers for Advanced Technologies*, 2019, **30**, 839-851.
- 85 5. R. A. Auras, L. T. Lim, S. E. M. Selke and H. Tsuji, *Poly(lactic acid): Synthesis, Structures, Properties, Processing, and Applications*, Wiley, 2011.
- 86
